# Before the Endless Forms: Embodied Model of Transition from Single Cells to Aggregates to Ecosystem Engineering

Ricard V. Solé<sup>1,2,3,4\*</sup>, Sergi Valverde<sup>1,3,4</sup>

**1** ICREA-Complex Systems Lab, Universitat Pompeu Fabra, Barcelona, Spain, **2** Santa Fe Institute, Santa Fe, New Mexico, United States of America, **3** Institut de Biologia Evolutiva, UPF-CSIC, Barcelona, Spain, **4** European Centre for Living Technology, C Foscari University of Venice, Venice, Italy

## Abstract

The emergence of complex multicellular systems and their associated developmental programs is one of the major problems of evolutionary biology. The advantages of cooperation over individuality seem well known but it is not clear yet how such increase of complexity emerged from unicellular life forms. Current multicellular systems display a complex cell-cell communication machinery, often tied to large-scale controls of body size or tissue homeostasis. Some unicellular life forms are simpler and involve groups of cells cooperating in a tissue-like fashion, as it occurs with biofilms. However, before true gene regulatory interactions were widespread and allowed for controlled changes in cell phenotypes, simple cellular colonies displaying adhesion and interacting with their environments were in place. In this context, models often ignore the physical embedding of evolving cells, thus leaving aside a key component. The potential for evolving pre-developmental patterns is a relevant issue: how far a colony of evolving cells can go? Here we study these pre-conditions for morphogenesis by using CHIMERA, a physically embodied computational model of evolving virtual organisms in a pre-Mendelian world. Starting from a population of identical, independent cells moving in a fluid, the system undergoes a series of changes, from spatial segregation, increased adhesion and the development of generalism. Eventually, a major transition occurs where a change in the flow of nutrients is triggered by a sub-population. This ecosystem engineering phenomenon leads to a subsequent separation of the ecological network into two well defined compartments. The relevance of these results for evodevo and its potential ecological triggers is discussed.

**Citation:** Solé RV, Valverde S (2013) Before the Endless Forms: Embodied Model of Transition from Single Cells to Aggregates to Ecosystem Engineering. *PLoS ONE* 8(4): e59664. doi:10.1371/journal.pone.0059664

**Editor:** Johannes Jaeger, Centre for Genomic Regulation (CRG), Universitat Pompeu Fabra, Spain

**Received:** May 23, 2012; **Accepted:** February 20, 2013; **Published:** April 15, 2013

**Copyright:** © 2013 Solé, Valverde. This is an open-access article distributed under the terms of the Creative Commons Attribution License, which permits unrestricted use, distribution, and reproduction in any medium, provided the original author and source are credited.

**Funding:** This work has been supported by grants of the James McDonnell Foundation (RVS, SV), Fundación Marcelino Botín (RVS, SV), FIS2004-05422 (RVS) and by the Santa Fe Institute. The funders had no role in study design, data collection and analysis, decision to publish, or preparation of the manuscript.

**Competing Interests:** The authors have declared that no competing interests exist.

\* E-mail: ricard.sole@upf.edu

## Introduction

A key problem in evolutionary biology is the emergence of complex life forms under the cooperation of several interacting cells [1,2]. Multicellularity emerged through evolution several times (at least 25) and has been a prerequisite for the generation of complex types of development [3–6]. This major transition brought division of labour and opened the door for the emergence of development and body plans [7–9]. But for many reasons, and in spite of its obvious importance, the evolution of multicellularity is not yet well understood. The fossil traces of the transition are still incomplete, although rapidly improving. However, dedicated efforts to unravel the phylogeny of multicellular living forms, the analysis of special model organisms and the cues provided by the presence of potential genetic toolkits predating the emergence of complex metazoans are defining the potential minimal requirements for the transition towards complex multicellular life forms.

This transition is particularly relevant for the critical changes that took place around 560 Myr ago, associated to the so called Cambrian event [1,10] but its roots predate a much earlier time window, as indicated by the analysis of ancestral genomes. Moreover, the picture gets more complicated as we consider additional components related to the physical environment and the

constraints and opportunities posed by ecological interactions. Actually, the multiple facets of the debate on the origins of multicellular organisms have to do with the role played by the different potential shapers of the event. These multiple factors are not independent, and are likely to have interacted in complex ways.

In general terms, the multicellular state is characterized by the existence of cell-cell interactions of some sort that provide a source for collective adaptation to energy limitations, physical fluctuations and eventually division of labor. In multicellular organisms, lower-level entities (cells) have relinquished their ability to reproduce as independent units and instead replicate exclusively as part of the larger whole. But long before a developmental body plan was even defined, in what has been dubbed the “pre-Mendelian world” [11], several layers of complexity were required. This as a particularly relevant problem deeply tied with the problem of hierarchies in evolution [12–13].

Before developmental programs allowed true multicellular organisms to emerge, single cells developed into monomorphic aggregates and later on into differentiated aggregates [13]. Moreover, cell adhesion mechanisms required for the emergence of multicellularity have a much early origin [14]. In this context, long before complex metazoans appeared, some key components

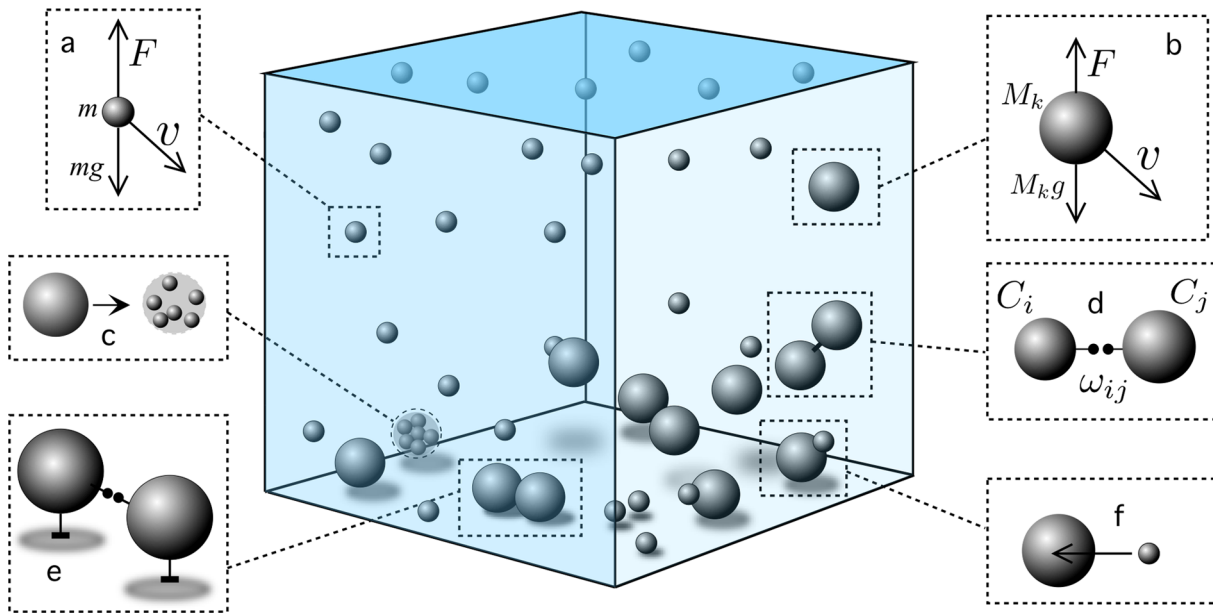

**Figure 1. Basic scheme of the components of the CHIMERA model.** The system is confined within a rigid cube with a floor where particles fall and to which cells can attach. Five additional square boundaries are also present which cannot be crossed. The upper boundary allows a flow of nutrient particles (here small spheres) at a constant rate. Particles fall under gravity (a,b) and experience local turbulence as a random velocity field. As they reach the floor, they can keep moving under the same flow and also disappear as they degrade (c) into detritus particles. Cells can evolve adhesion among them (d) as well as with the substrate (e). Finally, cells and particles (f) interact through collisions. If the cell is able to exploit that particular type of energy, the particle involved disappears and is transformed into cell's biomass (see text).  
doi:10.1371/journal.pone.0059664.g001

of the toolkit were already in place. How did these components affected the transition to multicellularity is an open question, and theoretical models can help to address it.

Most mathematical and computational models dealing with early evolution of development assume that either genetic networks or even body plans are already in place or instead deal with pattern-forming colonies and their potential to form structures under given spatial and nutrient constraints [15–17]. However, less attention has been given to the physics associated to these processes, particularly in relation with early scenarios lacking fine-tuned genetic regulation of development. By physics we refer to two different levels. One includes diffusion, excitability, oscillations or even cellular interaction forces, which can be captured by cell sorting models based on energy minimization functionals [11,18,19,20]. In this context, it is possible to evolve morphologies and observe the interplay between cell differentiation, growth and communication [21–23] with a properly defined optimization algorithm. The other level deals with the embedding of cells and organisms within a physical medium. Here, forces are closer to standard physics, i.e., the way cells might displace in the three-dimensional environment, how cells interact with the substrate and how cells find nutrients in a fluctuating medium. Previous work on physically-embedded artificial systems was pioneered by a number of researchers, who evolved artificial “organisms” [24,25]. Related work has considered the interplay between genetic networks and morphogenesis [26–30].

In this paper we would like to address, under a well defined framework, some questions related to the pre-multicellular world where cell aggregates (but not true organisms or body plans) could develop, providing some key preconditions for multicellularity to emerge. In particular, we would like to understand how the physical context, cell-cell adhesion properties, ecological and epigenetic factors concur to favor the emergence of cell aggregates. Moreover, we would like to understand how the environment

influences (and can be influenced by) the evolution of cell diversity and cell-cell interactions. These are, we believe, important pieces in the extended evolutionary synthesis provided by evo-devo [31].

We also try to see how this explicit three-dimensional embodiment can play a role in favoring the emergence of innovations. We explore such a pre-body plan scenario, and its potential for generating complexity, by allowing a physically-embedded model of a cellular community to freely evolve. The interaction between our simple evolved aggregates and the environment is shown to trigger the emergence of *ecosystem engineering* (EEN) an important component in macroevolutionary patterns [32]. EEN can be defined as a modification of the abiotic environment by a species that affects resource availability for other species [33–37]. Because it involves a persistent ecological

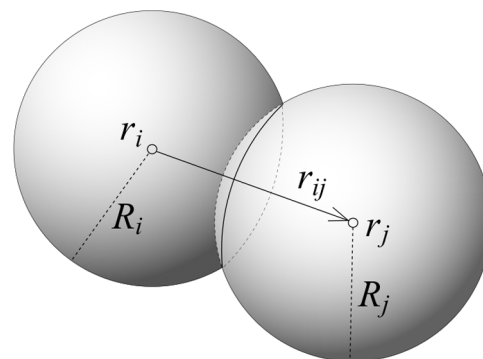

**Figure 2. Simplified geometry of cell-cell collisions.** Here,  $r_i$  and  $r_j$  are the cell positions,  $r_{ij}$  is the offset vector,  $R_i$  and  $R_j$  are the cell radius, and  $R_i + R_j - |r_{ij}|$  is the interpenetration depth.  
doi:10.1371/journal.pone.0059664.g002

modification, its presence implies the existence of ecological inheritance.

As we will shown below, a simple model of physically interacting cells with adhesion properties starting from a set of independent, genetically identical cells exploiting a single energy resource (from a given repertoire) evolves in time towards a spatially segregated community involving a trophic chain. The ecological network includes both a population of generalists feeding on all available food sources along with a population of specialized detritivores. The transition from the original monomorphic population to the spatially organized aggregate with ecological structure takes place through the emergence of an innovation grounded in evolving adhesion between cells and walls as well as cell-cell adhesion. In spite of its simplicity, it fairly well illustrates the potential of this type of model to explore the emergence of major transitions in pre-Mendelian scenarios.

## Environment, Cells and Physical Simulation

In our model, evolution takes place within a spatially confined environment (the spatial domain is a cube with floor and walls) where physical forces play a role as external constraints. Organisms are spatially embedded structures and their embodiment is relevant as it provides the proper link with the external world and the biotic scenario where other organisms inhabit.

Physical models of cell interactions have been developed for a broad range of problems involving multicellular assemblies [38–41] and our study follows some of the standard methods of computational physics [42]. Figure 1 displays a basic scheme of the system considered here along with the different components of the physical interactions that will be taken into account.

### 1.1 Cells and particles

Our starting point is a population of single-cell organisms, where each cell in the initial population is identical. Cells and particles are simulated with rigid bodies moving within a fluid-like environment. A cell (particle) has spherical geometry with radius  $R_i$ , mass  $M_i$ , spatial position  $r_i$  and velocity  $\mathbf{v}_i = d\mathbf{r}_i/dt$ . The motion of a cell is described by the standard second law:

$$M_i \frac{d\mathbf{v}_i}{dt} = \mathbf{F}_i \quad (1)$$

Numerical integration gives cell velocity at time  $t + \Delta t$ :

$$\mathbf{v}_i(t + \Delta t) = \mathbf{v}_i(t) + \frac{\mathbf{F}_i}{M_i} \Delta t \quad (2)$$

where  $\Delta t$  is the size of the integration step, and the total force acting on  $M_i$  will be:

$$\mathbf{F}_i = \mathbf{F}_e + \mathbf{F}_i^c + \mathbf{F}_i^n + \mathbf{F}_i^l - k_d \mathbf{v}_i + M_i \mathbf{g} \quad (3)$$

applied to any cell is the sum of environmental forces  $\mathbf{F}_e$ , the gravitational field  $\mathbf{g}$ , the collision force  $\mathbf{F}_i^c$ , the cell-wall adhesion  $\mathbf{F}_i^n$  and the cell-cell adhesion  $\mathbf{F}_i^l$  term.

### 1.2 Environmental forces

For simplicity, we assume that the external environment exerts the same force to every cell or particle, i. e.:

$$\mathbf{F}_e = k_e \mathbf{n} \quad (4)$$

where  $\mathbf{n}$  is a random vector with  $|\mathbf{n}| = 1$  and  $k_e > 0$  is a constant parameter that indicates the strength of the external field. This choice implies that external fluctuations in the fluid medium are homogeneous, thus affecting all parts of the system uniformly. This approximation thus neglects potential effects played by small-scale eddies, which might actually play a role in adaptational changes.

Movement of particles in a fluid is subject to dissipation, as defined by a viscous drag ( $-k_d \mathbf{v}_i$ ) where  $k_d$  is the drag coefficient associated to the surrounding fluid. The effect of drag is to resist motion, making the particle gradually come to rest in the absence of other influences.

### 1.3 Cell-cell collisions

We apply the discrete element method [43] to the computation of collision forces between the  $i$ -th cell and all its interpenetrating cells, that is, cells located at a distance below a given threshold (see figure 2):

$$\mathbf{F}_i^c = \sum_{i \neq j} v \left[ \mathbf{v}_{ij} - \frac{\mathbf{r}_{ij}}{\|\mathbf{r}_{ij}\|} \left( \mathbf{v}_{ij} \frac{\mathbf{r}_{ij}}{\|\mathbf{r}_{ij}\|} \right) \right] + \xi \mathbf{v}_{ij} - \nabla \Phi_{ij}(\mathbf{r}_{ij}; R_i, R_j) \quad (5)$$

where  $v$  is the shear coefficient,  $\xi$  is the damping coefficient,  $k$  is the spring coefficient, and  $\mathbf{r}_{ij} = \mathbf{r}_j - \mathbf{r}_i$  is the offset vector between the  $\mathbf{r}_i$  and  $\mathbf{r}_j$  cell positions, and  $\mathbf{v}_{ij} = \mathbf{v}_j - \mathbf{v}_i$  is the difference between cell velocities. The last term in the right-hand side gives the force resulting from a potential function associated to a soft-core interaction, namely:

$$\Phi_{ij}(\mathbf{r}_{ij}; R_i, R_j) = \frac{1}{2} k (R_i + R_j - \|\mathbf{r}_{ij}\|)^2 \quad (6)$$

Computation of spatial interaction forces requires  $N(N-1)/2$  possible collision checks for  $N$  bodies in the worst-case scenario. In order to reduce this computational load we will use a spatial partitioning scheme. Here, a 3-D uniform grid subdivides the entire container volume in equally-sized square voxels [42]. All the bodies (cells and particles) are sorted by a mapping function  $\mathbf{h}(\mathbf{r})$  that computes their voxel index:

$$\mathbf{h}(\mathbf{r}) = \frac{1}{d} (\mathbf{r} - \mathbf{o}) \quad (7)$$

where  $\mathbf{o}$  is the grid origin and  $d$  is the voxel size. For each body, we only check their collisions with different particles and cells belonging to a neighboring voxel, i.e., having indexes  $\mathbf{h}(\mathbf{r})$  or  $\mathbf{h}(\mathbf{r}) \pm 1$ . By adjusting the size of the voxel partition, we can minimize the total number of collision tests and enable the real-time simulation of large numbers of physically interacting bodies.

### 1.4 Cell-substrate adhesion

Attachment of cells to surfaces may provide a favorable micro-environment (e.g., biofilms). Cell-wall distance  $D(\mathbf{r}_i)$  is:

$$D(\mathbf{r}_i) = \frac{ax_i + by_i + cz_i + d}{\sqrt{a^2 + b^2 + c^2}} \quad (8)$$

where  $ax + by + cz + d = 0$  is the plane equation for the closest wall to the cell located at  $\mathbf{r}_i = (x_i, y_i, z_i)$ . When a cell with adhesion

strength to the substrate  $J_i^f > 0$  is closer than the adhesion range  $\delta_w > 0$ , i.e.,  $D(\mathbf{x}_i) < \delta_w$ , we attach a spring connecting the cell  $\mathbf{x}_i$  with its projection on the wall  $\mathbf{x}_i^w$  (see figure 3). Now, the wall spring exerts the following attraction force:

$$\mathbf{F}_i^n = -k_s (\|\mathbf{r}_i - \mathbf{r}_i^w\| - d_s) \frac{\mathbf{r}_i - \mathbf{r}_i^w}{\|\mathbf{r}_i - \mathbf{r}_i^w\|} \quad (9)$$

where  $d_s$  is the spring equilibrium distance,  $k_s$  is the spring constant and  $\mathbf{F}_i^n = 0$  when the cell is not attached to any spring. Existing cell-wall springs can be removed with certain probability  $1 - q(i)$  or when the spring length is above the maximal length, i.e.,  $\|\mathbf{r}_i - \mathbf{r}_i^w\| > d_s^m$ . As we will see, cells can evolve cell-wall adhesion  $J_i^f$  in order to maximize the intake of nutrient particles.

### 1.5 Cell-cell adhesion

Cells can form aggregates by attaching to other cells. Each cell has an intrinsic probability  $J_i^c$  to create a new adhesion link. Given two close cells located at  $\mathbf{r}_i$  and  $\mathbf{r}_j$ , we will set an adhesion string connecting them with probability  $(J_i^c + J_j^c)/2$ . The adhesion force to any cell is the sum of forces contributed by all the active cell-cell adhesion springs:

$$\mathbf{F}_i^a = - \sum_j k_l (\|\mathbf{r}_i - \mathbf{r}_j\| - d_l) \frac{\mathbf{r}_i - \mathbf{r}_j}{\|\mathbf{r}_i - \mathbf{r}_j\|} \quad (10)$$

where  $d_l$  is the spring equilibrium distance, and  $k_l$  is the spring constant. Adhesion springs break spontaneously with rate  $\delta \approx 0.001$  or when the spring is very large, i.e.,  $\|\mathbf{r}_i - \mathbf{r}_j\| > d_l$ .

On the other hand, interpenetration collisions between cells and walls are not resolved with explicit forces (see figure 3A). When a body interpenetrates a wall, it bounces along its negative velocity direction, i.e.,  $\mathbf{v}_i(t + \Delta t) = \mu \mathbf{v}_i(t)$  by a constant factor  $\mu < 0$ . In addition, we relocate the body outside the wall (see below). This approximation ensures that particles will never move beyond container limits and does not change the main results presented here. The final cell (or particle) position is obtained from:

$$\mathbf{r}_i(t + \Delta t) = \mathbf{r}_i(t) - \delta \mathbf{n} + \mathbf{v}_i(t + \Delta t) \Delta t \quad (11)$$

where  $\delta > 0$  is the cell-wall interpenetration distance and  $\mathbf{n}$  is the unit normal vector of the wall at the collision point with  $|\mathbf{n}| = 1$  (see figure 3A).

Finally, the computation of particle force  $\mathbf{f}_i$  is more simple than in the case of cells. Food particles can collide with boundary walls, other particles and with cells (see below). But particles cannot adhere to the walls, or to any other body. The total force exerted on a particle is

$$\mathbf{f}_i = \mathbf{F}_e + \mathbf{f}_i^p + \mathbf{f}_i^c - k_d \mathbf{v}_i + \mathbf{g} \quad (12)$$

where  $\mathbf{F}_e$  is the environmental force (as defined for cells, see above),  $\mathbf{v}_i$  is the particle velocity and  $\mathbf{g}$  is the gravity field. Particle collision force  $\mathbf{f}_i^p$  is similar to the equation used to compute cell collision responses (5) but using particle mass ( $M$ ) and radius ( $r$ ). Similarly, the term  $\mathbf{f}_i^c$  accounting for the collision response between any pair of interpenetrating particles mirrors equation (5).

We have calibrated the parameters associated to the physics as described above in order to avoid numerical instabilities. We have used small integration steps, i.e.,  $\Delta t = 0.03$  and fixed several physical parameters, including the cell and particle masses and the

spring constants, to suitable values. An exhaustive exploration of the physical parameter space will be investigated elsewhere.

### Evolutionary Rules

Once our embodied, physical description of how interactions take place within our environment, we need to further extend our model by including evolutionary rules. Mechanical interactions, for example, can be understood in terms of predefined mechanisms (constraints derived from the nature of physical laws) together with sets of parameters that tune their relevance in terms of how different forces influence dynamics. In this paper we explore the impact of such parameter changes once the basic laws are already in place.

The introduction of physical constraints as part of the framework defining our cells and their interactions allows us to integrate different factors emerging at the boundaries between physics and biology. Moreover, the explicit nature of selection pressures associated with gathering nutrients from a spatially explicit, fluctuating environment allows to explicitly introduce ecological factors into play. In summary, the model takes into account physical embodiment, ecological and evolutionary constraints and allows interaction parameters among cells to change. Although no developmental programs or gene regulatory modules can emerge at this level, we will see how the degrees of freedom included in our approximation allow cell aggregates to emerge, along with innovation and the creation of niches.

At any given time, there is a set of cells  $\{C_i\}$  and a set of energy particles of identical mass  $m$  belonging to different energy types, here indicated as  $E_k$ , with  $k = 1, \dots, n_p$  (here we use  $n_p = 4$  sources). Each cell  $C_i$  can in principle metabolize a subset of different sources with efficiency  $\eta_{ik} \in [0, 1]$ . At the beginning, we start from a homogenous population of  $N_0$  cells, each having mass  $M_i = M_0$ , all feeding on the same resource, namely  $E_1$  i.e.,  $\eta_{i1} > 0$  and  $\eta_{ij} = 0$  for all  $j > 1$ . At every simulation step, we introduce  $N_p$  new particles in the system (here we use  $N_p = 80$ , uniformly distributed over each class) starting at the top of our world. This number provides a quantitative value to the intake energy flow  $\Phi$  of particles entering the system.

Eventually, cells collide with nutrient particles and consume them according to the cell-specific efficiency  $\eta_{ij}$  (a given nutrient particle is consumed only when this is non-zero, otherwise the particle is deflected and does not enter into the cell body). A particle of class  $E_k$  will be successfully grazed contributing to a linear mass increase:

$$M_i(t + \Delta t) = M_i(t) + \eta_{ik} m \quad (13)$$

Once consumed, the particle is removed from the system. Nutrient particles have a characteristic lifetime and degrade at rate  $\mu_p$ . Cells consume a constant amount of energy  $e_s > 0$  per time step to sustain themselves. A cell dies when mass  $M_i$  falls below a critical threshold  $M_i < M_c$ . Cell death leads to disintegration and the release of  $(M_i(t)/m) \approx (M_c/m)$  residual particles to the medium. These detritus particles will be consumed by detritivores when their associated efficiency is nonzero. Detritus particles have also a characteristic lifetime and degrade with a slower degradation rate, here fixed to  $\mu_p/2$ .

Cells divide once their total mass is at least twice their initial mass,  $M_i(t) \geq 2M_0$ . After reproduction, the mother cell  $C_i$  reduces its mass by  $M_0$ , which is transferred to the daughter cell, say  $C_k$ . In other words, we have

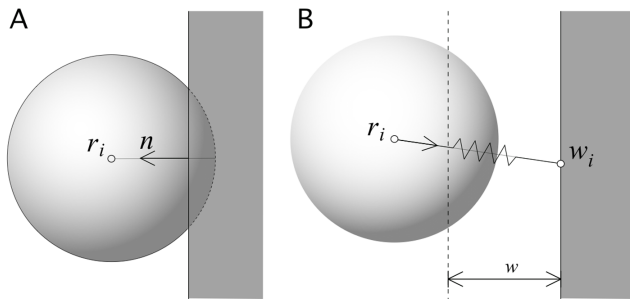

**Figure 3. Possible interactions between cells and boundary walls.** (A) Bouncing collision takes place when the cell interpenetrates the nearest wall any distance  $\delta > 0$  along the unit normal vector  $n$  of the wall. (B) Cell-wall adhesion occurs when cell-wall distance is below some threshold  $w$  and according to adhesion probability (which depends on the cell genome, see text). In this case, a spring attaches the cell to a fixed point  $w_i$  on the wall (see text). doi:10.1371/journal.pone.0059664.g003

$$M_i \rightarrow M_i - M_0$$

$$M_k = M_0$$

However, cell division is limited by the available surrounding space. Here, we allow the mother cell to reproduce only when its number of neighboring cells (i.e., cells within a radius of size  $2R_i$ ) is below a given density threshold  $N_c$ . The new offspring is placed at a random location close to the mother cell, and specific rules ensure that this new cell is within the boundaries of the simulated medium.

The offspring cell  $C_k$  inherits metabolic efficiencies from the mother cell  $C_i$ . Metabolic efficiencies can be slightly changed, i. e.,

$$\eta_{jk} = \eta_{ik} + v$$

where  $v$  is non-zero with probability of mutation  $\mu \approx 0.02$  and zero otherwise. Here, the random  $v$  perturbation follows a Gaussian distribution with zero mean and standard deviation  $\sigma_m = 0.3$ . In addition, the offspring cell also inherits both cell-floor adhesion and cell-cell adhesion coefficients, respectively. Again, mutations are allowed to occur, and we have now:

$$J_k^f = J_i^f + v \quad (14)$$

$$J_k^c = J_i^c + v \quad (15)$$

The values of these parameters are always normalized between zero and one. If a given mutation is accepted and the parameters are either lower than zero or higher than one, they are fixed to zero or one, respectively. Similarly, efficiencies are normalized so that the condition  $\sum_j \eta_{ij} = 1$  is always satisfied.

## Results

As a result of the previous set of rules and initial condition, we have a simple ecological food web involving a set of resources and a single specialist grazer, which takes  $E_1$  particles and grows at the expense of metabolizing them. Further degradation of particles leads to waste that is removed from the virtual tank and moreover cell death also generates an additional resource (the detritus compartment,  $E_d$ ). Ecologically, this is our starting point, which will evolve as organisms change their feeding preferences and as a consequence of interactions between organisms and their physical environment.

Given the potential for evolving physical parameters as well as nutrient intake-related parameters, our cells will be able to evolve within a range of possible adaptations. For example, given the number of potential food sources to be consumed, we will observe a spread from the original parameter set defined by

$$\eta_{i1} = 1 \cap \eta_{ij>1} = 0 \quad (16)$$

to a continuum space of efficiencies

$$\eta_i \equiv \{(\eta_{i1}, \dots, \eta_{im}) \mid \eta_{ij} \in [0, 1]; \sum_j \eta_{ij} = 1\} \quad (17)$$

As we will see below, these spread leads to a predictable outcome in a first phase of the evolution process, while it leads to an unexpected innovation later on.

### 1.1 Transition to generalism epoch

The first trend observed in all our simulations is a tendency from the starting specialization (all cells exploiting one source with maximal efficiency) to generalism: mutations allow to exploit other resources with less efficiency but overall this is a better strategy given the finite amount of energy particles. In our model,  $n_p = 4$  different types of energy particles are used. Additionally, since detritus particles resulting from cell death can also be consumed, a total of  $n_p + 1$  types of particles are available.

Nutrients enter the system from the upper layer at a constant rate  $p$  and degrade into waste at a rate  $\delta_k$ . Under the absence of grazers, the time evolution of the number  $N_k$  of energy particles of class  $k$  will follow a linear model  $dN_k/dt = p - \delta_p N_k$  (for  $k = 1, \dots, n_p$ ) and thus each component will have an average steady value of  $N_k^* = p/\delta_p$ . Then, the overall number of particles at the beginning (before grazing starts) will be  $N^* = \Phi p/\delta$  with  $\Phi = n_p p$  is the total flow of incoming particles. Right at the beginning, our grazers exploit only one source particle (say  $E_1$ ). If no mutations were involved, we would observe a trend towards an equilibrium population of both cells and class-one particles over time.

The above describes the basic dynamics that occurs at the very early stages in our model, when only one source is being exploited. However, since we are interested in the long-term evolution, we would like to study the particle-grazer population dynamics. One of the first trends easily observed in our model is the tendency towards a broader range of exploitable resources, that is, grazers become generalists. Such trend towards a more opportunistic behavior occurs when the payoff given by the exploitation of a variety of resources outweighs the loss of efficiency as more resources are grazed.

The degree of generalism of a given individual is measured by means cell entropy  $H(C_i)$  defined as as the normalized diversity of efficiencies:

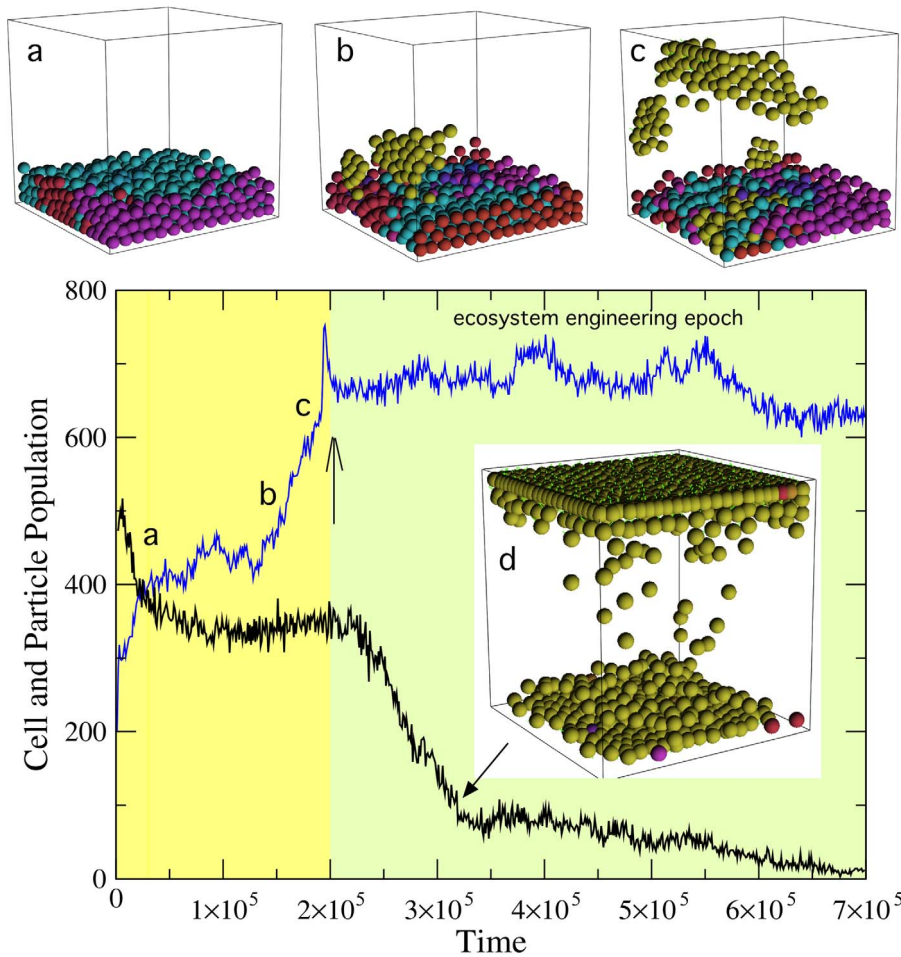

**Figure 4. The time evolution of cells (blue) and particles (black) can be described with a sequence of processes.** Before the transition to the inverted population state (inset) cells grow and divide as they also evolve their characteristic parameters. At the beginning, the cell population grows by adapting to the variety of energy sources and we can see a thick layer of cells (a) plotted at  $t = 17000$ . After a while, an increase in the surface displayed by the population increases its efficiency to gather particles. Such increase is reached by evolving cell-substrate and cell-cell adhesion. The state shown in (b) is found at  $t = 170000$  where we can appreciate a cluster of cells which appear to be climbing the surface of the cube. In (c) the cluster close to reaching the upper floor (here  $t = 200000$ ) at this point the cell population does not experience further significant increase, but the number of particles decays to very low values. Here bright cells have high floor adhesion (where yellow indicates maximum adhesion) and darker colors correspond to cells with low adhesion or free-moving. Notice that adhesion evolves first in cells close to the wall boundaries. Here:  $\Phi = 25$  particles per timestep,  $\Delta t = 0.03$ ,  $\delta_w = 0.05$ ,  $d_s = 0.01$ ,  $v = 80$ ,  $\xi = 80$ ,  $k = 400$ ,  $M_i = 20$ ,  $R_i = 0.08$ ,  $m_i = 3.35$ ,  $r_i = 0.025$ ,  $k_e = 2$ ,  $k_d = 0.001$  (see text).

doi:10.1371/journal.pone.0059664.g004

$$H(C_i; \eta_i) = - \frac{1}{\log(n_p + 1)} \sum_{1 \leq j \leq n_p + 1} \eta_{ij} \log[\eta_{ij}] \quad (18)$$

where  $\eta_{ij}$  is the relative efficiency of the  $i$ -th cell when feeding on the  $j$ -th nutrient resource and  $n_p$  is the number of different resources. Notice that, in the initial configuration, all cells have entropy  $H(C_i) = 0$ . As defined, the degree of generalism will be zero when only one source is used (specialized diet) and will reach a maximum value for individuals grazing on multiple sources. Similarly, since the average efficiency for each cell is given by

$$\langle \eta_{ij} \rangle = \frac{1}{n_p(i)} \sum_j \eta_{ij} \quad (19)$$

where  $n_p(i)$  indicates the number of nutrient sources exploited by  $C_i$ , given the normalization of efficiencies we have simply  $\langle \eta_{ij} \rangle = 1/n_p(i)$ .

The simulation shows a steady increase of cell-wall attachment and cell-cell adhesion followed by a steady increase in number of cells. This is a consequence of the fact that, in order to get access to falling particles, a larger surface is needed. Cells who attach to the surface can climb up the walls. Having a moderate cell-cell adhesion also helps in avoiding them to fall down. In this way, we have formed aggregates that are moving up as cells divide. The impact of this, along with the simultaneous tendency towards a generalist grazing behavior, can be seen in figure 4. The cell population (blue curve) grows rapidly as the aggregates start to emerge and expand, eventually covering the top layer.

During the process, groups of cells, often forming layers parallel to the floor, become increasingly larger. Three snapshots involving transient steps (a-c) are also displayed in figure 4, where we have used color-coded spheres to indicate the strength of the cell-wall

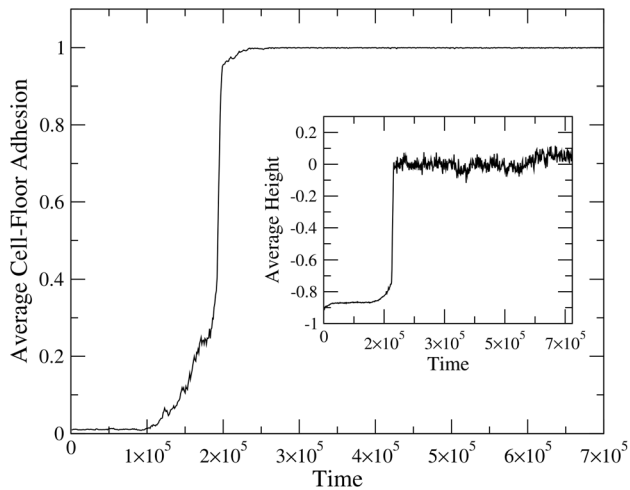

**Figure 5. Sharp transition in the time evolution of average cell-floor adhesion.** This transition is associated to the increasing height (inset) of the cell populations as further cells climb the walls towards the upper layer. Here the top floor is taken as the zero coordinate, whereas the bottom floor is taken as the  $z = -1$  (normalized) minimum (see text).

doi:10.1371/journal.pone.0059664.g005

adhesion. Lighter and spheres indicate higher and lower levels of adhesion, respectively.

## 1.2 Transition to ecosystem engineering epoch

As cells occupy the upper layer, the flow of nutrients further declines (filled arrow, figure 4) to reach very low levels. The kinetics of this process and how it is connected with evolving adhesion rates is summarized in figure 5, where we plot the average cell-floor adhesion (averaging over all the cell population) and the corresponding average height of cells within the cube (inset). Here we have used the top floor as the ground height ( $z=0$ ) and the bottom one as the minimum. For convenience, we have normalized the later to  $z=-1$ . We can appreciate in these plots how rapidly the selection for higher adhesion occurs. As a consequence of this redistribution of cells through the upper part of the system, a whole redistribution of flows takes place, effectively triggering the emergence of a new ecological organization.

The most relevant result of our study is a key innovation made by our evolving cell populations as they “discover” that gathering particles is easier if they attach to the top floor of the system. As discussed above, cells approach the nutrient source by evolving cell-floor adhesion. This allows the population to expand its effective area for gathering nutrients, but it also favors more frequent interactions with particles, which are trapped between cells and the walls. This makes intake slightly higher than far from the boundary increases (and thus a higher fitness) because the sustained intake of nutrients. Eventually, cells with high floor adhesion ( $J_i \approx 1$ ) colonize the source of nutrients in a brief burst of super-exponential growth. This is illustrated by figure 4d, where we can see a snapshot of our system soon after cells have “discovered” the roof. In terms of the population dynamics, it is also observed that the number of free nutrient particles declines as they are more efficiently found and removed from the system.

The emergence of EEN is common but requires both a high enough intake of energy (the flow of particles,  $\Phi$ ) and a moderate level of environmental fluctuations. The analysis of these two parameters reveals several phases in the potential types of structures that the system generates. This is illustrated in figure 6

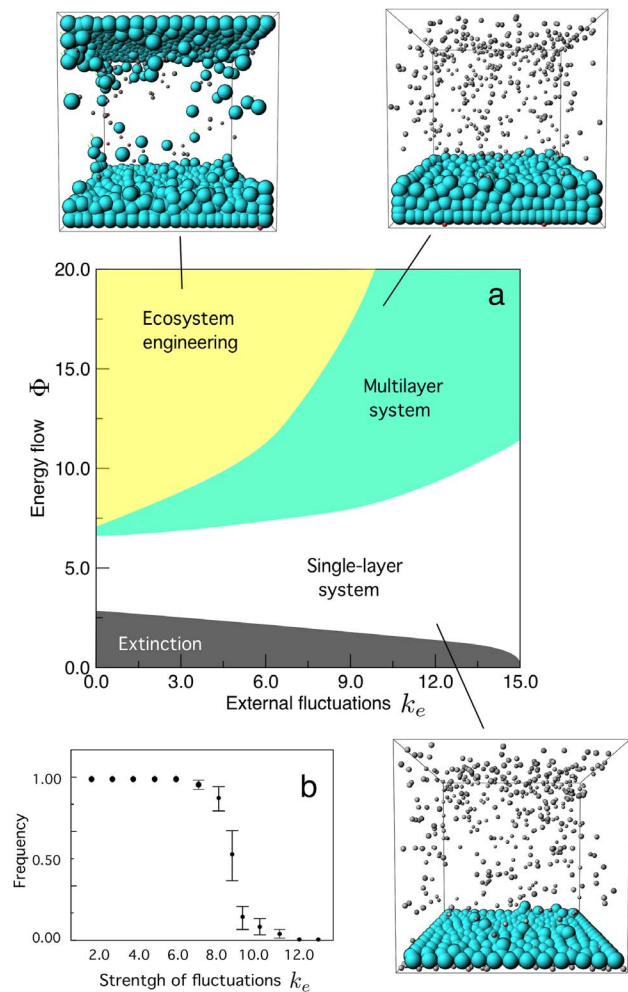

**Figure 6. Interplay between energy intake and environmental fluctuations on the emergence of ecosystem engineering in CHIMERA's model.** Here we have run CHIMERA using the same parameters of the previous figure but with different combinations of  $(k_e, \Phi)$ . Four phases are found (a) including extinction (lower part), cellular monolayers as well as multilayered systems. Examples of each scenario are indicated with 3D snapshots where the adhesion strength between cells and the boundaries is color coded. A quantitative analysis of the transition from the EEN to the multilayer phase is indicated in (b), where  $\Phi=20$  has been used along with different levels of fluctuation. Ten replicas of each parameter combination were used and  $2 \times 10^5$  steps used to determine the final state. The standard deviation is also shown as error bars.

doi:10.1371/journal.pone.0059664.g006

where we present a summary of our exploration of the parameter space defined by  $(k_e, \Phi)$ . The choice of these two parameters is based on considering two relevant aspects associated to adaptation in evolving systems. The amplitude of the external fluctuations (as given by  $k_e$ , see equation 4) provides a measure of the random movements experienced by both cells and energy particles. In order to approximately determine the boundaries of these phases, the parameter space was partitioned into  $25 \times 25$  pairs and evolution experiments were done for each pair.

The phase diagram reveals four phases. As it should be expected, at low flow levels the initial population cannot sustain itself. However, it is interesting to notice that the domain of extinction gets smaller for higher levels of perturbation. This is understandable when we realize what that means. Since we use a

closed system, both cells and particles are influenced by external noise and, at high levels, there is a coherent movement of both types of elements, which end to aggregate in the corners of the lower level. This introduces a natural increase of encounter rates and thus allows cell survival more feasible. In a way, the high environmental noise leads to a predictable outcome due to the presence of boundary conditions.

The next phase (indicated in white color) involves a more or less stable population of cells that are confined to the floor of the system. Adhesion is high for low  $k_e$  and decreases to small (but non-zero) levels at higher levels. Here the population presents the largest area compatible with the incoming flow. On top of this phase, several layers can be stabilized. Well-defined smooth multilayers are observed on the left part of the diagram whereas they become a bit rugged on the right side, due to the presence of noise. A moderate level of cell-cell interactions allows to stabilize the system. It is within this phase that the initially multilayered system can develop a more complex organization and EEN.

An example of the type of transition that occurs between phases is illustrated in figure 6b. Here we have fixed the incoming flow to  $\Phi=20$  and determined the presence or absence of a top population of cells after  $2 \times 10^5$  steps, using different  $k_e$  values. Averaging over ten replicas for each  $k_e$ , we obtain a phase transition close to the reported boundary. Around  $k_e^* \approx 8$  we observe a phase change separating two clear domains associated to the presence  $k_e < k_e^*$  or absence  $k_e > k_e^*$  of a top layer. The error bars provide the standard deviation and are highest at the transition point, consistently with so called second-order transitions [44] where fluctuations strongly increase at criticality.

### 1.3 Emergence of detritivores

A major consequence is derived from this innovation. As cells in the top layer start to dominate the whole flow of nutrients, something new happens. After the colonization is completed, cells die and their waste material falls to the bottom. The resulting detritus stays for a while and is eventually removed by degradation. But some cells have already developed a mild efficiency to exploit these particles. After falling from the roof, these cells will find themselves inhabiting a niche that is rich in a given type of energy source. After a while, they develop a higher efficiency and eventually become specialists. This is illustrated in figure 7a–b, where we can see that the efficiency of detritivores grows fast after the top floor population has been established.

In the inset of figure 7a we display an example of the stationary state. This transition illustrates the nonlinear impact of ecosystem engineering [31–33]. By changing the flow of nutrients, the top floor population causes a physical change in the environment due to their spatial distribution. As it occurs with freshwater phytoplankton organisms, which intercept light by placing themselves on the top of the water column or with higher plants, producing litter form dead leaves, our ecosystem provides a clever example of this scenario. By modulating the flow of nutrients, which eventually shifts from nutrient-rich to detritus-dominated flows, an effective asymmetry is generated.

The process of niche creation and the emergence of ecosystem engineering promote a new feedback towards the way detritivores behave. If cell-cell adhesion is allowed to evolve, it can be shown that the detritivore compartment evolves significant adhesion among individual cells, which can be described as a new form of

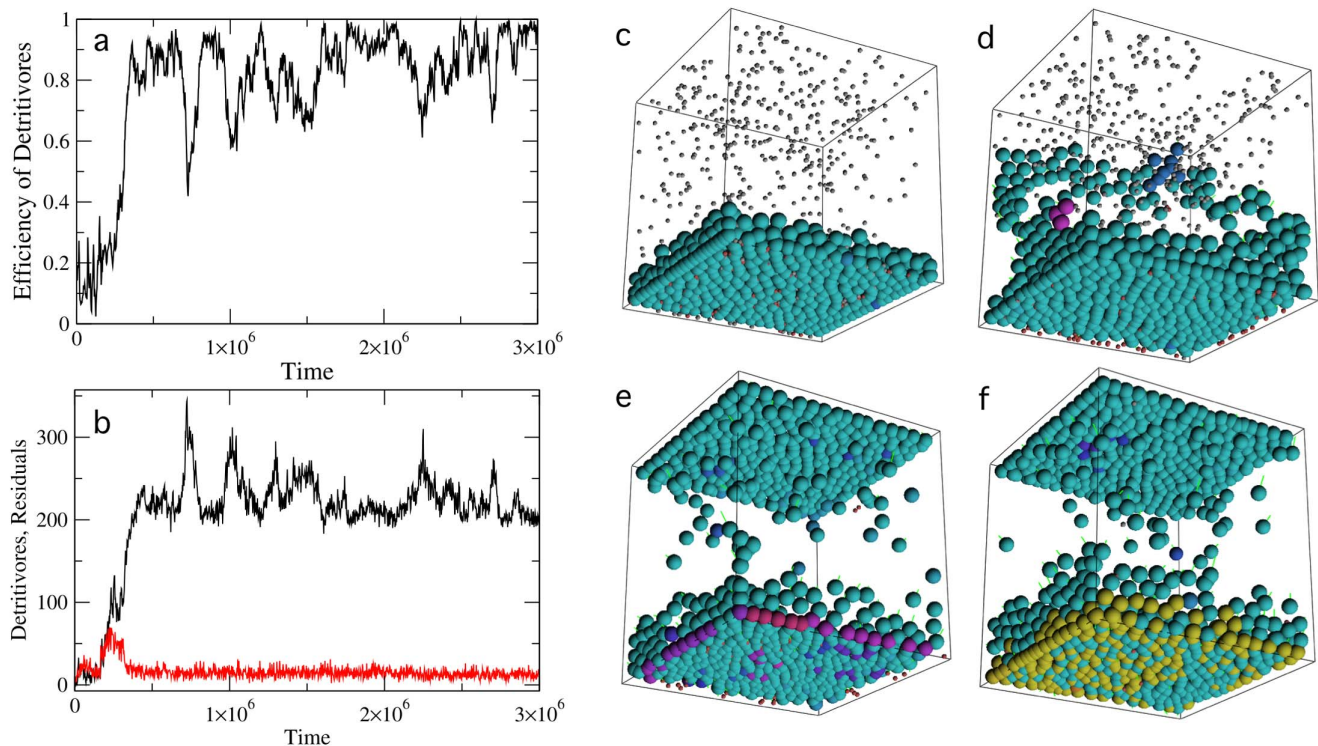

**Figure 7. Dynamics of detritus grazing.** In (a) the increase in efficiency rate of detritus-grazing cells is shown. In (b) we display the population dynamics of both detritivores (number of cells exhibiting some level of detritus feeding behavior) and detritus particles. In (c–f) four snapshots of the evolved system are shown. Detritivores evolve initially at the corners between wall boundaries thanks to the increased concentration of residuals. Afterwards, detritivores spread along the bottom plane and consume residuals produced by the disintegration of generalist cells coming from above. Four snapshots are shown in (c–f) at different times in the evolution of detritivores. Hot colors indicate the relative detritivore efficiency. Here:  $\Phi = 25$  particles per timestep,  $\Delta t = 0.03$ ,  $\delta_w = 0.05$ ,  $d_s = 0.01$ ,  $v = 80$ ,  $\xi = 80$ ,  $k = 400$ ,  $M_i = 20$ ,  $R_i = 0.08$ ,  $m_i = 3.35$ ,  $r_i = 0.025$ ,  $k_e = 2$ ,  $k_d = 0.001$  (see text). doi:10.1371/journal.pone.0059664.g007



cell aggregate. It is interesting to notice that our aggregates do not cooperate in terms of sharing resources, but instead they emerge from selection constraints imposed by the requirement of an expanded area, which can only be obtained by attaching to the vertical surfaces. An additional advantage is obtained by living in higher locations: energy particles are falling near there and in fact, in the presence of fluctuations, it is likely that particles hitting the walls are captured by cells adhered to them. But the process has a discontinuity: by covering the roof, an accelerated transformation takes place, modifying the whole organization of the ecological assembly and allowing the emergence of an additional trophic compartment.

In figure 8 we summarize the ecological transitions experienced by our system as we cross through the different regimes. Here we have indicated the flows of matter from the external energy sources to waste. In fig. 8a, the initial state of our system is shown, with several sources of particles but only one being exploited by the single specialist. Such scenario is slowly replaced by a

heterogeneous one (fig. 8b) marked by an increasing tendency to generalism: mutations affect efficiency rates and the potential for exploiting several resources. As evolution proceeds and cells develop adhesion (here indicated as small protrusions) along with a complete generalism (c). Here we indicate with  $\{E_i\}$  that cells use equally all types of nutrients with the same coupling. Eventually (d) the new niche of detritus-rich particles triggers the evolution of a specialized population of detritivores. This result is predictable, provided that the abundance of incoming particles is large enough.

## Discussion

In this paper we have presented a spatially-explicit model of evolution that incorporates ecology, physical embodiment and a very simple description of individuals. Our motivation was to provide an *in silico* platform to explore early stages of multicellular evolution under a pre-Mendelian scenario. Such pre-Mendelian world would be characterized by a higher morphological plasticity, far from the gene-regulated one of the Cambrian world [11,18]. In

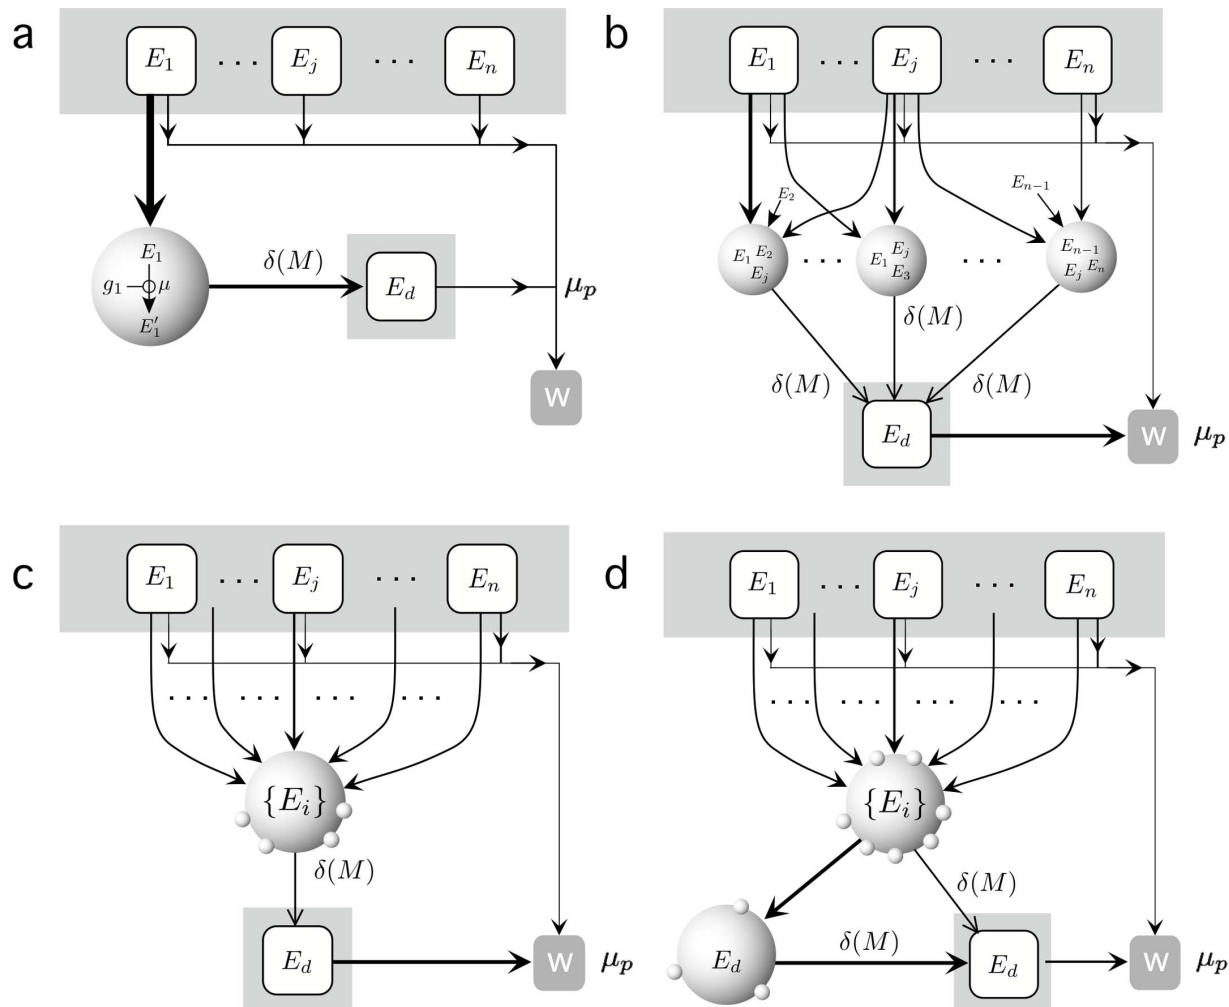

**Figure 8. Chimera's food webs.** (a) Flows in the initial food web, limited to a population of single-cell elements eating only one energy source ( $E_1$ ) as defined by the CHIMERA model. The 1st nutrient is processed by the cells and transformed into cellular components high efficiency. At the end of the life cycle, the cell disintegrates into a number of residual particles. All molecules have similar degradation rates and get removed (right, lower box) from the system. After a while (b) an intermediate, diverse ecosystem is observed, with a large variety of cell exploiting different resources. This process proceeds until most cells become generalists, able to exploit all sources (c) whereas adhesion (indicated with smaller spheres) increases. Finally, once the population attached to the top floor has developed, another specialized population emerges at the bottom, fully composed by detritivores.

doi:10.1371/journal.pone.0059664.g008

order to explore the potential repertoire of multicellular patterns that can emerge under these conditions, we have used a specific setting where a vertical flow of nutrients is introduced at the upper boundary of our system.

If the initial steps towards life took place in water, an appropriate model considering the role of physical interactions must take into account (a) events taking place within a fluid and (b) those associated to physical exchanges between individuals and individuals with the boundaries of the system (such as the sea bottom or a pond floor). By considering these basic forces, we introduce a minimal set of (possible) rules of interaction that can evolve through time. Such rules allow our artificial cells to explore their environment, interact and make decisions. But it also provides a very basic framework to explore the potential for finding patterns of pre-developmental pathways based on interactions among single-celled entities.

Despite the simplified nature of our simulation approach, which prevents (in particular) the emergence of complex regulatory networks and introduce limitations to the spatial organization of cell aggregates, several nontrivial results emerge. The evolutionary transition from the floor to the top layer leads to ecosystem engineering [27] and, as far as we know, this is the first example of such event happening in an artificial life system. By changing the actual flow of nutrients, they cause a physical change in the environment due to their physical distribution. Moreover, by doing so they also allow the emergence of a specialized, spatially segregated compartment of detritivores. Following the classification scheme from [35], our artificial creatures are autogenic engineers: they change their environment mainly via their own physical structures. Here the main structure created is a cell barrier associated to cell-floor interactions. The tempo of the transition exhibits a marked acceleration as the cell aggregates approach the top of the world. We can actually see that the cell population moves through its world by increasing in size until they detect the asymmetry associated to the top-down and start exploiting it. As it occurs with any other system out of equilibrium, our system is sustained by a gradient linked to a given flow of energy. In terms of the innovation process, the punctuated nature of the change is due to the transient time required in order to physically reach the energy-rich boundary and exploit it.

Future work should consider the explicit introduction of minimal genetic networks, the potential for cooperation in terms of nutrient sharing, an active role of our organisms in modifying their environmental conditions (thus adding an additional layer to the potential for ecosystem engineering) and variability of spatial conditions. These *in silico* experiments could be compared in some cases with evolutionary sequences of growth and selection observed in experiments involving transitions from single-cell to

multicellular aggregates [45–49]. In this context, it can help designing and interpreting experimental approaches based on the introduction of selection favoring given traits. All these extensions of the CHIMERA model will allow us to approach relevant questions concerning the tempo and mode of the transition to multicellularity and how the different players (ecology, genetic interactions, physical embodiment and path dependence) influence the final outcome.

Finally, CHIMERA can be used to explore the effect of external events involving large extinctions and their aftermath. Recovery from mass extinction provides a unique insight into how communities are rebuilt and the role played by different biotic and abiotic components in the reconstruction of a paleocommunity [50,51]. This is very well illustrated by the end-Permian extinction event [52,53] which devastated most species, to the point of near annihilation of complex life forms. The existing fossil record of the process and the patterns of change is very rich and well established [54] and illustrates the power of looking at macroevolutionary dynamics using multiple perspectives, from geological data to multispecies interactions. Some theoretical and computer models [55–57] have shown that a systems approach to these events can help to determine potential causal scenarios of recovery. But these models lack the physical embodiment that is characteristic of our model both at the individual and ecosystem levels. Since we also can trace the patterns of change in sediment particles and have a well-established segregation between trophic levels, we have a unique way of evaluating the relative contributions of ecological processes of competition or cooperation as well as the underlying evolutionary changes taking place at the individual level. These *in silico* experiments can help understanding the role played by altruism and cooperation and how they emerge and the nature of the resulting cooperative units [58,59].

## Acknowledgments

This work started on a flight between Barcelona and New York and developed over the last years between Santa Fe, Venice, New York and the Complex Systems Lab. We thank the members of the Lab for so many useful discussions. SV thanks David Baraff for useful advices on constrained rigid-body simulation. We also thank the hospitality of the European Centre for Living Technology (ECLT) and the Santa Fe institute.

## Author Contributions

Conceived and designed the experiments: RVS SV. Performed the experiments: RVS SV. Analyzed the data: RVS SV. Wrote the paper: RVS.

## References

- Carroll SB (2005) Endless forms most beautiful: The New Science of Evo Devo and the Making of the Animal Kingdom. W. W. Norton and Co.
- Grossberg RK, Strahmann RR (2007) The Evolution of Multicellularity: A Minor Major Transition? *Annual Reviews of Ecology and Evolution and Systematics* 38: 621–654.
- Knoll AH (2011) The Multiple Origins of Complex Multicellularity *Annual Reviews in Earth and Planetary Science* 39: 217–239.
- Lipps JH, Signor PH (1992) *Origin and early evolution of the Metazoa*. Plenum Press, New York.
- Rokas A (2008) The molecular origins of multicellular transitions. *Current Opinion Genetics and Development* 18: 472–478.
- King N (2004) The unicellular ancestry of animal development. *Developmental Cell* 7: 313–325.
- Maynard Smith J, Szathmari E (1995) *The major transitions in evolution*. Oxford U. Press.
- Niklas K (1997) *The Evolutionary Biology of Plants*. University of Chicago Press. Chicago.
- Bonner JT (2001) *First signals: the evolution of multicellular development*. Princeton U. Press.
- Fedonkin MA (2007) *The Rise of Animals: Evolution and Diversification of the Kingdom Animalia*. JHU Press.
- Newman SA, Forgacs G, Muller GB (2006) Before programs: the physical origin of multicellular forms. *International Journal of Developmental Biology* 50: 289–299.
- Eldredge N (1985) *Unfinished Synthesis: Biological Hierarchies and Modern Evolutionary Thought*. Oxford University Press.
- McShea DW (2001) The hierarchical structure of organisms: a scale and documentation of a trend in the maximum. *Paleobiology* 27: 405–423.
- Sebe-Pedros A, Roger AJ, Lang FB, King N, Ruiz-Trillo I (2010) Ancient origin of the integrin-mediated adhesion and signaling machinery. *Proceedings of the National Academy of Sciences USA* 107: 10142–10147.
- Solé RV, Fernandez P, Kauffman SA (2003) Adaptive walks in a gene network model of morphogenesis: insights into the Cambrian explosion. *International Journal of Developmental Biology* 47: 685–693.

16. Fujimoto K, Ishihara S, Kaneko K (2008) Network evolution of body plans. *PLoS ONE* 3: e2772.
17. Tusscher KH, Hogeweg P (2011) Evolution of networks for body plan patterning; interplay of modularity, robustness and evolvability. *PLoS Computational Biology* 7: e1002208.
18. Newman SA, Baht R (2008) Dynamical patterning modules: physico-genetic determinants of morphological development and evolution. *Physical Biology* 5: 015008.
19. Graner F, Glazier JA (1992) Simulation of biological cell sorting using a two-dimensional extended Potts model. *Physical Review Letters* 69: 2013–2016.
20. Glazier JA, Graner F (1993) Simulation of the differential adhesion driven rearrangement of biological cells. *Physical Review E* 47: 21282154.
21. Hogeweg P (2000) Evolving Mechanisms of Morphogenesis: on the Interplay between Differential Adhesion and Cell Differentiation. *Journal of Theoretical Biology* 203: 317333.
22. Hogeweg P (2000) Shapes in the shadow: Evolutionary dynamics of morphogenesis. *Artificial Life* 6: 85–101.
23. Savill NJ, Hogeweg P (1997) Modeling morphogenesis: from single cells to crawling slugs. *Journal of Theoretical Biology* 184: 229–235.
24. Sims K (1994) Evolving 3D morphology and behavior by competition. *Artificial Life* 1: 353–372.
25. Pfeifer R, Lungarella M, Lida F (2007) Self-Organization, Embodiment, and Biologically Inspired Robotics. *Science* 318: 1088–1093.
26. Eggenberger P (1997) Evolving morphologies of simulated 3d organisms based on differential gene expression. In: Fourth Europ. Conf. Artificial Life, P. Husbands and I. Harvey, editors. 205–213. MIT Press.
27. Doursat R (2008) Organically grown architectures: creating decentralized, autonomous systems by embryomorph engineering. In: *Organic Computing*, R. P. Würtz, ed: 167–200. Springer-Verlag.
28. Cummings F (2006) On the origin of pattern and form in early metazoans. *International Journal of Developmental Biology* 50: 193–208.
29. Kaandorp JA, Blom JG, Verhoef J, Filatov M, Postma M, et al. (2008) Modelling genetic regulation of growth and form in a branching sponge. *Proceedings of the Royal Society B* 275: 2569–2575.
30. Coen E, Rolland-Lagan AG, Matthews M, Bangham JA, Prusinkiewicz P (2004) The genetics of geometry. *Proceedings of the National Academy of Sciences USA* 101: 4728–4735.
31. Müller GB (2007) Evo-devo: extending the evolutionary synthesis. *Nature Reviews Genetics* 8: 943–949.
32. Forgacs G, Newman SA (2005) *Biological physics of the developing embryo*. Cambridge Univ. Press, Cambridge.
33. Erwin DH (2008) Macroevolution of ecosystem engineering, niche construction and diversity. *Trends Ecol Evol* 23: 304–310.
34. Jones CG, Lawton JM, Shachak M (1994) Organisms as ecosystem engineers. *OIKOS* 69: 373–370.
35. Jones CG, Lawton JM, Shachak M (1997) Positive and negative effects of organisms as physical ecosystem engineers. *Ecology* 78: 1946–1957.
36. Erwin DH, Tweedt S (2012) Ecological drivers of the Ediacaran-Cambrian diversification of Metazoa. *Evolutionary Ecology* 26: 417–433.
37. Hastings A (2006) Ecosystem engineering in space and time. *Ecology Letters* 10: 153–164.
38. Palsson E (2001) A Three-dimensional model of cell movement in multicellular systems. *Future Generation Computer Systems* 17: 835–852.
39. Palsson E, Othmer HG (2000) A model for individual and collective cell movement in *Dictyostelium discoideum*. *Proceedings of the National Academy of Sciences USA* 97: 10448–10453.
40. Newman TJ (2005) Modeling Multi-cellular Systems using Sub-cellular Elements. *Mathematical biosciences and engineering* 2: 611–622.
41. Sandersius SA, Newman TJ (2008) Modelling cell rheology with the subcellular element model. *Physical Biology* 5: 015002.
42. Bell N, Yu Y, Muchs PJ (2005) Particle-Based Simulation of Granular Materials. In: SCA '05 Proceedings of the 2005 ACM SIGGRAPH Eurographics symposium on Computer animation. 77–86.
43. Ericson C (2005) Real-Time Collision Detection. Morgan Kaufmann.
44. Solé RV (2011) *Phase Transitions*. Princeton U. Press, Princeton.
45. Greig D, Louis EJ, Borts RH, Travisano M (2002) Hybrid speciation in experimental populations of yeast. *Science* 298: 1773–1775.
46. Rainey PB, Travisano M (1998) Adaptive radiation in a heterogeneous environment. *Nature* 394: 69–72.
47. Travisano M, Mongold JA, Bennett AF, Lenski RE (1995) Experimental tests of the roles of adaptation, chance, and history in evolution. *Science* 267: 87–90.
48. Lenski RE, Travisano M (1994) Dynamics of adaptation and diversification: a 10,000-generation experiment with bacterial populations. *Proceedings of the National Academy of Sciences USA* 91: 6808–6814.
49. Ratcliff WC, Denison RF, Borrello M, Travisano M (2012) Experimental evolution of multicellularity. *Proceedings of the National Academy of Sciences USA* 109: 1595–1600.
50. Erwin DH (1998) The end and the beginning: recoveries from mass extinctions. *Trends in Ecology and Evolution* 13: 344349.
51. Erwin DH (2001) Lessons from the past: biotic recoveries from mass extinction. *Proceedings of the National Academy of Sciences USA* 98: 53995403.
52. Erwin DH (1994) The Permo-Triassic extinction. *Nature* 367: 231236.
53. Benton MJ, Twitchett RJ (2003) How to kill (almost) all life: the end-Permian extinction event. *Trends in Ecology and Evolution* 18: 358365.
54. Chen ZQ, Benton MJ (2012) The timing and pattern of biotic recovery following the end-Permian mass extinction. *Nature Geoscience* 5: 375383.
55. Solé RV, Montoya JM, Erwin DH (2002) Recovery after mass extinction: evolutionary assembly in large-scale biosphere dynamics. *Philosophical Transactions of the Royal Society B* 357: 697707.
56. Roopnarine PD (2006) Extinction cascades and catastrophe in ancient food webs. *Paleobiology* 32: 1–19.
57. Yedid G, Stredwick J, Ofria CA, Agapow PM (2012) A comparison of the effects of random and selective mass extinctions on erosion of evolutionary history in communities of digital organisms. *PLoS ONE* 7: e37233.
58. Queller DC (1997) Cooperation since life began. *Quarterly Review of Biology* 72: 184–188.
59. Queller DC (2000) Relatedness and the fraternal major transitions. *Philosophical Transactions of the Royal Society B* 355: 1647–1655.
